# Supplementary material for: Sodium taurocholate cotransporting polypeptide is a functional receptor for human hepatitis B and D virus
Source: PubMed Central journal article supplement (PMC3485615; doi:10.7554/elife.00049), 2012-11-13
Supplement: elife00049s001.pdf [file elife00049s001.pdf]

Figure 2 - Source Data 1

Top ten non-redundant proteins identified in the three samples by MS analysis

|                                                                                                                                                                                                                                                                                                                                                                                                                                                                                     | Name                                                 | Length (aa) | MolWt (Da) | Sequence Count | Spectrum Count | Functional Annotation                                                                      | Sequence Coverage |
|-------------------------------------------------------------------------------------------------------------------------------------------------------------------------------------------------------------------------------------------------------------------------------------------------------------------------------------------------------------------------------------------------------------------------------------------------------------------------------------|------------------------------------------------------|-------------|------------|----------------|----------------|--------------------------------------------------------------------------------------------|-------------------|
| 65kDa – WT <sub>v</sub> /PNGaseF (-) sample                                                                                                                                                                                                                                                                                                                                                                                                                                         | GENSCAN_GS00000231568                                | 209         | 22371      | 4              | 13             | ref[NP_002761.1] trypsin-2 preproprotein [Homo sapiens]                                    | 14.80%            |
|                                                                                                                                                                                                                                                                                                                                                                                                                                                                                     | comp5_c0_seq1 GENSCAN_predicted_peptide_1 608_aa     | 608         | 68682      | 3              | 11             | ref[NP_000468.1] 609 serum albumin preproprotein [Homo sapiens]                            | 4.30%             |
|                                                                                                                                                                                                                                                                                                                                                                                                                                                                                     | ENSTBEP0000000142                                    | 128         | 14403      | 2              | 13             | ref[NP_003372.1] VIP peptides isoform 1 preproprotein [Homo sapiens]                       | 9.40%             |
|                                                                                                                                                                                                                                                                                                                                                                                                                                                                                     | comp7554_c0_seq2 GENSCAN_predicted_peptide_1 379_aa  | 379         | 41483      | 2              | 8              | ref[NP_003040.1] 349 sodium/bile acid cotransporter [Homo sapiens]                         | 6.60%             |
|                                                                                                                                                                                                                                                                                                                                                                                                                                                                                     | GENSCAN_GS00000235950                                | 102         | 10754      | 1              | 1              | ref[NP_004474.2] glycine cleavage system H protein, mitochondrial precursor [Homo sapiens] | 21.80%            |
|                                                                                                                                                                                                                                                                                                                                                                                                                                                                                     | comp376_c0_seq1 GENSCAN_predicted_peptide_1 733_aa   | 733         | 84789      | 1              | 1              | ref[NP_005339.3] 732 heat shock protein HSP 90-alpha isoform 2 [Homo sapiens]              | 2.50%             |
|                                                                                                                                                                                                                                                                                                                                                                                                                                                                                     | comp59_c0_seq2 GENSCAN_predicted_peptide_1 330_aa    | 330         | 37147      | 1              | 2              | ref[NP_995584.1] 265 UDP-glucuronosyltransferase 1-6 isoform 2 [Homo sapiens]              | 2.40%             |
|                                                                                                                                                                                                                                                                                                                                                                                                                                                                                     | GENSCAN_GS00000261263                                | 802         | 84357      | 1              | 4              | ref[NP_006112.3] keratin, type II cytoskeletal 1 [Homo sapiens]                            | 1.50%             |
|                                                                                                                                                                                                                                                                                                                                                                                                                                                                                     | GENSCAN_GS00000252787                                | 713         | 73842      | 1              | 2              | ref[NP_000412.3] keratin, type I cytoskeletal 10 [Homo sapiens]                            | 1.30%             |
|                                                                                                                                                                                                                                                                                                                                                                                                                                                                                     | comp218_c0_seq1 GENSCAN_predicted_peptide_1 1178_aa  | 1178        | 129710     | 1              | 4              | ref[NP_071504.2] 1178 pyruvate carboxylase, mitochondrial precursor [Homo sapiens]         | 1.20%             |
| 43 kDa – WT <sub>v</sub> /PNGaseF (+) sample                                                                                                                                                                                                                                                                                                                                                                                                                                        | GENSCAN_GS00000231568                                | 209         | 22371      | 5              | 25             | ref[NP_002761.1] trypsin-2 preproprotein [Homo sapiens]                                    | 12.90%            |
|                                                                                                                                                                                                                                                                                                                                                                                                                                                                                     | comp7554_c0_seq2 GENSCAN_predicted_peptide_1 379_aa  | 379         | 41483      | 3              | 6              | ref[NP_003040.1] 349 sodium/bile acid cotransporter [Homo sapiens]                         | 6.60%             |
|                                                                                                                                                                                                                                                                                                                                                                                                                                                                                     | comp5_c0_seq1 GENSCAN_predicted_peptide_1 608_aa     | 608         | 68682      | 8              | 32             | ref[NP_000468.1] 609 serum albumin preproprotein [Homo sapiens]                            | 6.20%             |
|                                                                                                                                                                                                                                                                                                                                                                                                                                                                                     | comp218_c0_seq1 GENSCAN_predicted_peptide_1 1178_aa  | 1178        | 129710     | 2              | 5              | ref[NP_071504.2] 1178 pyruvate carboxylase, mitochondrial precursor [Homo sapiens]         | 2.00%             |
|                                                                                                                                                                                                                                                                                                                                                                                                                                                                                     | ENSTBEP0000000142                                    | 128         | 14403      | 1              | 4              | ref[NP_003372.1] VIP peptides isoform 1 preproprotein [Homo sapiens]                       | 9.40%             |
|                                                                                                                                                                                                                                                                                                                                                                                                                                                                                     | GENSCAN_GS00000279109                                | 265         | 28676      | 1              | 2              | ~ref[NP_037362.1] signal transducer CD24 precursor [Homo sapiens]                          | 7.90%             |
|                                                                                                                                                                                                                                                                                                                                                                                                                                                                                     | ENSTBEP00000001232                                   | 676         | 75890      | 1              | 1              | ref[NP_659001.2] sciellin isoform 1 [Homo sapiens]                                         | 6.70%             |
|                                                                                                                                                                                                                                                                                                                                                                                                                                                                                     | GENSCAN_GS00000184315                                | 322         | 34272      | 1              | 1              | ref[NP_001989.2] fibulin-2 isoform b precursor [Homo sapiens]                              | 5.30%             |
|                                                                                                                                                                                                                                                                                                                                                                                                                                                                                     | GENSCAN_GS00000184883                                | 238         | 25776      | 1              | 1              | Uncharacterized protein                                                                    | 2.90%             |
|                                                                                                                                                                                                                                                                                                                                                                                                                                                                                     | comp5222_c0_seq1 GENSCAN_predicted_peptide_1 1285_aa | 1285        | 148568     | 1              | 1              | ref[NP_004990.3] 1285 myosin-VI [Homo sapiens]                                             | 1.50%             |
| 43 kDa – N9K <sub>v</sub> /PNGaseF (+) sample                                                                                                                                                                                                                                                                                                                                                                                                                                       | GENSCAN_GS00000203437                                | 578         | 61569      | 14             | 45             | ref[NP_005546.2] keratin, type II cytoskeletal 6B [Homo sapiens]                           | 15.80%            |
|                                                                                                                                                                                                                                                                                                                                                                                                                                                                                     | GENSCAN_GS00000261263                                | 802         | 84357      | 10             | 46             | ref[NP_006112.3] keratin, type II cytoskeletal 1 [Homo sapiens]                            | 6.50%             |
|                                                                                                                                                                                                                                                                                                                                                                                                                                                                                     | GENSCAN_GS00000261502                                | 378         | 40781      | 8              | 24             | ref[NP_000517.2] keratin, type I cytoskeletal 14 [Homo sapiens]                            | 20.10%            |
|                                                                                                                                                                                                                                                                                                                                                                                                                                                                                     | GENSCAN_GS00000252787                                | 713         | 73842      | 8              | 24             | ref[NP_000412.3] keratin, type I cytoskeletal 10 [Homo sapiens]                            | 7.90%             |
|                                                                                                                                                                                                                                                                                                                                                                                                                                                                                     | ENSTBEP00000007380                                   | 537         | 59027      | 6              | 28             | ref[NP_000414.2] keratin, type II cytoskeletal 2 epidermal [Homo sapiens]                  | 7.10%             |
|                                                                                                                                                                                                                                                                                                                                                                                                                                                                                     | comp5_c0_seq1 GENSCAN_predicted_peptide_1 608_aa     | 608         | 68682      | 6              | 24             | ref[NP_000468.1] 609 serum albumin preproprotein [Homo sapiens]                            | 3.90%             |
|                                                                                                                                                                                                                                                                                                                                                                                                                                                                                     | GENSCAN_GS00000214315                                | 505         | 55293      | 5              | 13             | ref[NP_005548.2] keratin, type I cytoskeletal 16 [Homo sapiens]                            | 9.10%             |
|                                                                                                                                                                                                                                                                                                                                                                                                                                                                                     | GENSCAN_GS00000261260                                | 1169        | 125254     | 4              | 16             | ref[NP_778253.2] keratin, type II cytoskeletal 1b [Homo sapiens]                           | 3.20%             |
|                                                                                                                                                                                                                                                                                                                                                                                                                                                                                     | GENSCAN_GS00000211249                                | 815         | 90386      | 4              | 13             | ref[NP_002266.2] keratin, type I cytoskeletal 15 [Homo sapiens]                            | 3.70%             |
|                                                                                                                                                                                                                                                                                                                                                                                                                                                                                     | GENSCAN_GS00000223539                                | 804         | 89223      | 4              | 7              | ref[NP_000415.2] keratin, type II cytoskeletal 5 [Homo sapiens]                            | 4.60%             |
| <p><b>Name:</b> target protein name in the database. <b>Length:</b> number of amino acids. <b>MolWt:</b> calculated molecular weight (Dalton). <b>Sequence Count:</b> distinct peptides identified in a protein. <b>Spectrum Count:</b> number of spectrum identified in MS/MS. <b>Functional Annotation:</b> annotation of the protein according to their homolog in human. <b>Sequence Coverage:</b> percentage of the protein sequences that covered by identified peptides.</p> |                                                      |             |            |                |                |                                                                                            |                   |
